# Supplementary material for: Identification of differentially expressed genes in flower, leaf and bulb scale of Lilium oriental hybrid ‘Sorbonne’ and putative control network for scent genes
Source: PubMed Central journal article supplement (PMC5700745; doi:10.1186/s12864-017-4303-4), 2017-11-22

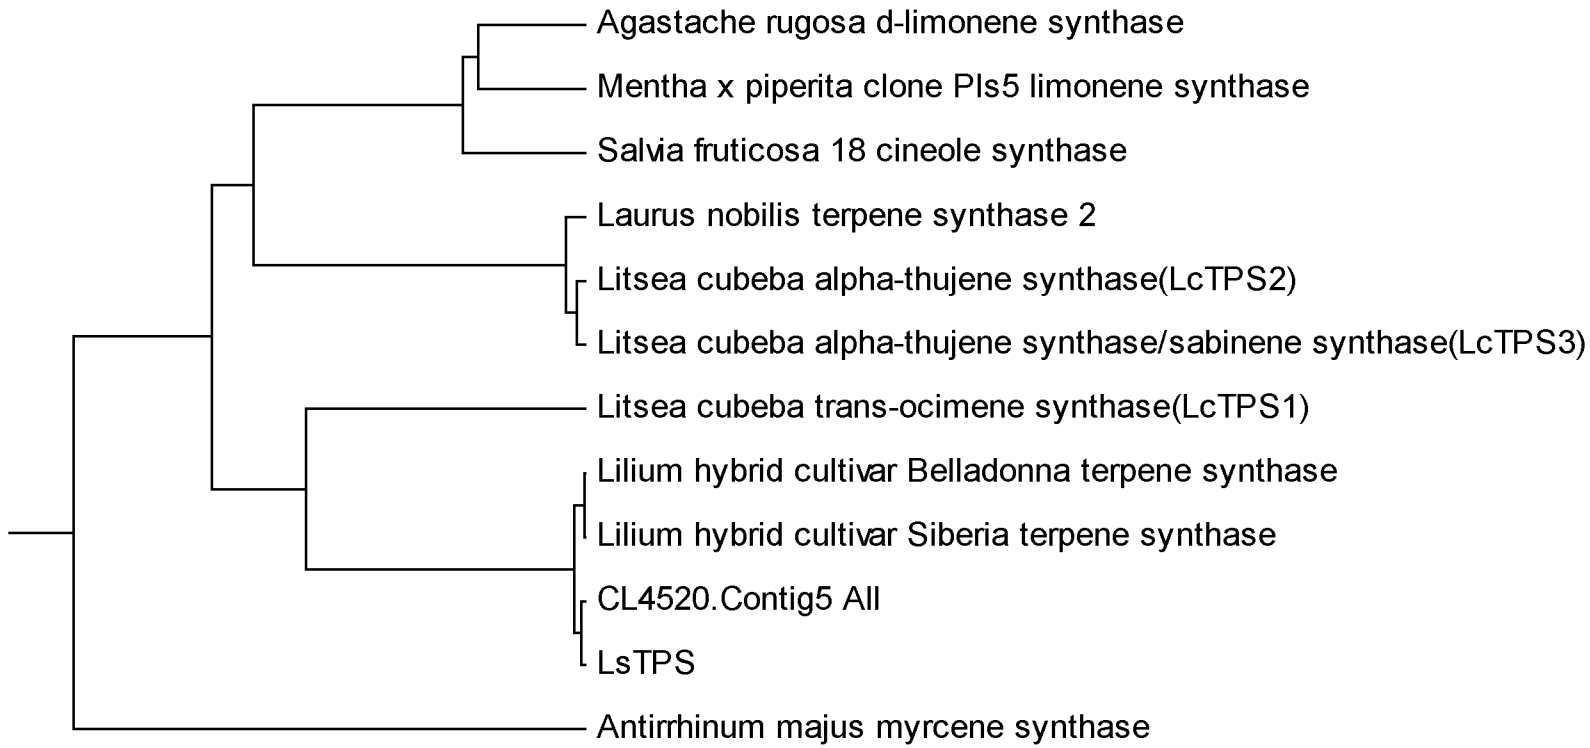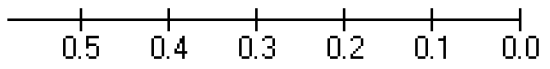

Supplement: 12864_2017_4303_MOESM12_ESM.pdf [file 12864_2017_4303_MOESM12_ESM.pdf]
