# Supplementary material for: Identification of differentially expressed genes in flower, leaf and bulb scale of Lilium oriental hybrid ‘Sorbonne’ and putative control network for scent genes
Source: PubMed Central journal article supplement (PMC5700745; doi:10.1186/s12864-017-4303-4), 2017-11-22
Supplement: 12864_2017_4303_MOESM13_ESM.pdf [file 12864_2017_4303_MOESM13_ESM.pdf]

Additional file 13: Table S12. Primer sequences used for qRT-PCR validation of RNA-seq data

| Transcript ID      | Gene         | Putative protein                                     | GI No.    | Primer pairs sequence (5'-3')                    |
|--------------------|--------------|------------------------------------------------------|-----------|--------------------------------------------------|
| CL1114.Contig2_All | <i>KAT</i>   | Benzyl-CoA                                           | 212723032 | F:TGCAGTGAAATCTGCTGGTC<br>R:GCAAAGCCTCGTTGATCTC  |
| CL1306.Contig1_All | <i>GGPPS</i> | Geranylgeranyl pyrophosphate synthase                | 357122245 | F:AAGGATCTCGCCACAGACAA<br>R:GCCTTCTCCACGTTGAATCC |
| CL4520.Contig5_All | <i>TPS</i>   | Trans-ocimene synthase                               | 339744294 | F:GAGACTCGCAAGGGTTCAAG<br>R:ATCCTACGGTGCAATGGAA  |
| Unigene4212_All    | <i>HPL</i>   | Hydroperoxide lyase                                  | 115443737 | F:AGGTTTACAGGTGCGAAAGG<br>R:GAGAATCTGAGCCACAAGCA |
| Unigene8314_All    | <i>DXS</i>   | 1-deoxyxylulose-5-phosphate synthase                 | 255583239 | F:GCTGCGACTGTCCTCTCTCT<br>R:TTGACACGAACATTGGATCA |
| CL4079.Contig1_All | <i>HDS</i>   | 4-hydroxy-3-methylbut-2-en-1-yl diphosphate synthase | 470117782 | F:GTCTTAATAAGGGCGTGGCG<br>R:CCACCTCGTCACTCTCCTTT |
